# Supplementary material for: Total synthesis of (−)-epimyrtine by a gold-catalyzed hydroamination approach
Source: publisher site journal article supplement (doi:10.3762/bjoc.9.242), 2013-10-09

# Supporting Information

for

## Total synthesis of (–)-epimyrtiline by a gold-catalyzed hydroamination approach

Thi Thanh Huyen Trinh, Khanh Hung Nguyen, Patricia de Aguiar Amaral and Nicolas Gouault\*

Address: Equipe PNSCM, UMR6226, Université de Rennes 1, 2 avenue du Pr Léon Bernard, 35043 Rennes Cedex, France

Email: Nicolas Gouault - [nicolas.gouault@univ-rennes1.fr](mailto:nicolas.gouault@univ-rennes1.fr)

\* Corresponding author

**Spectra of new compounds**

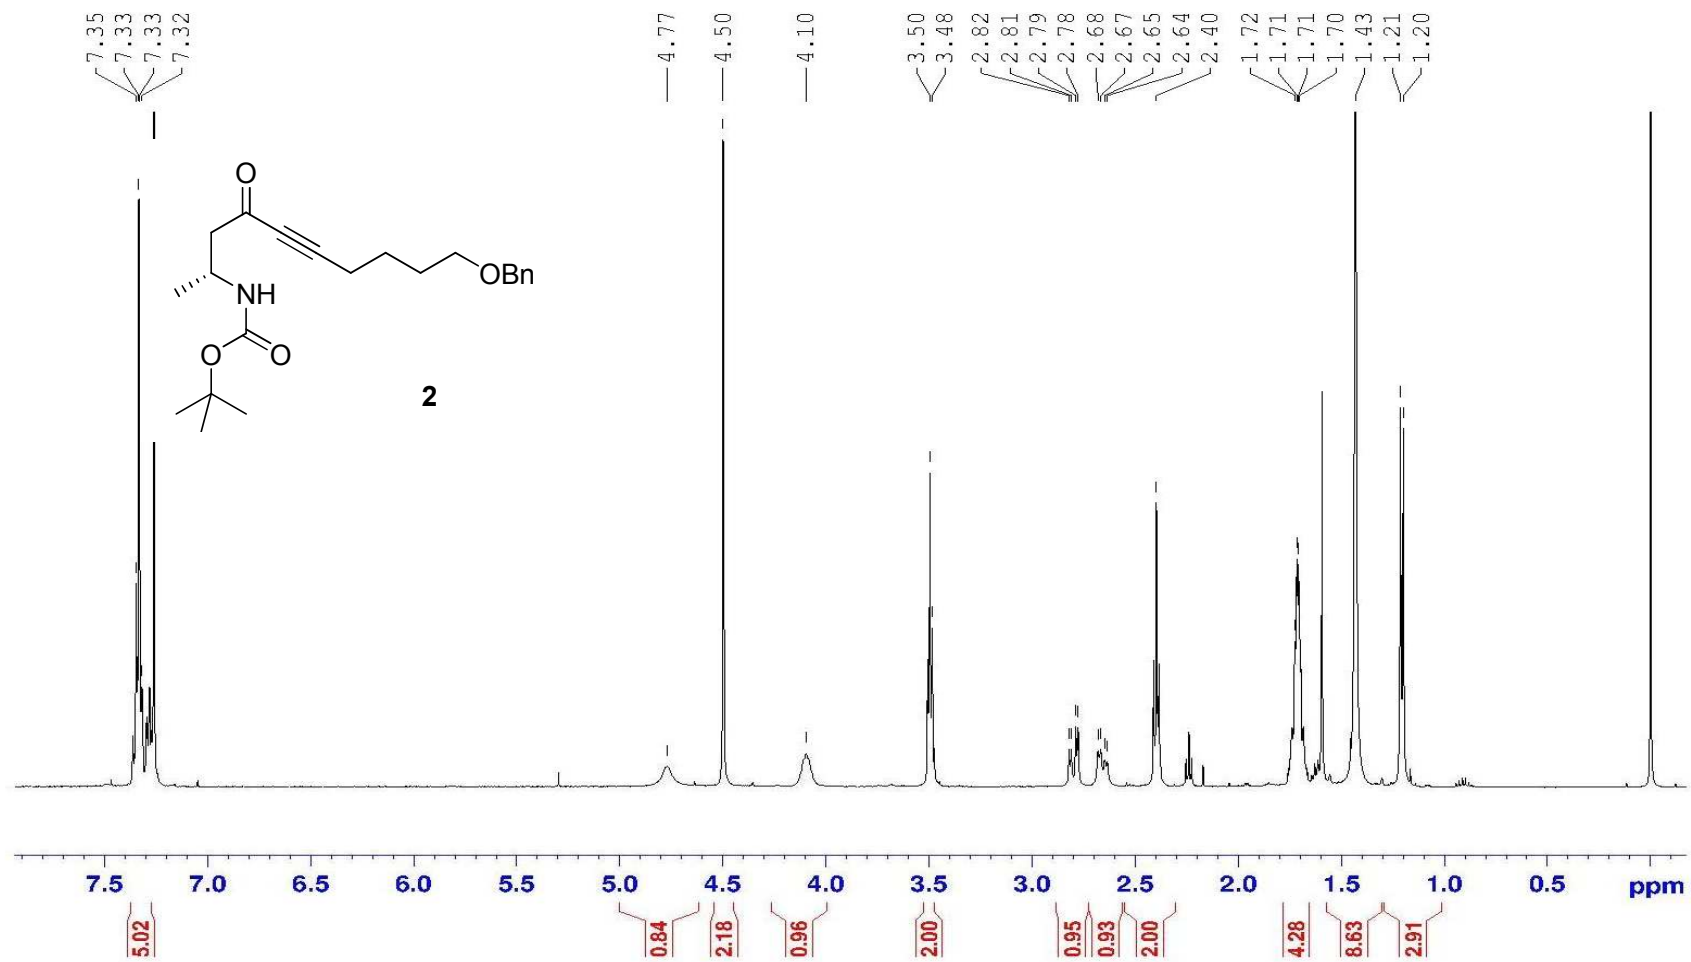

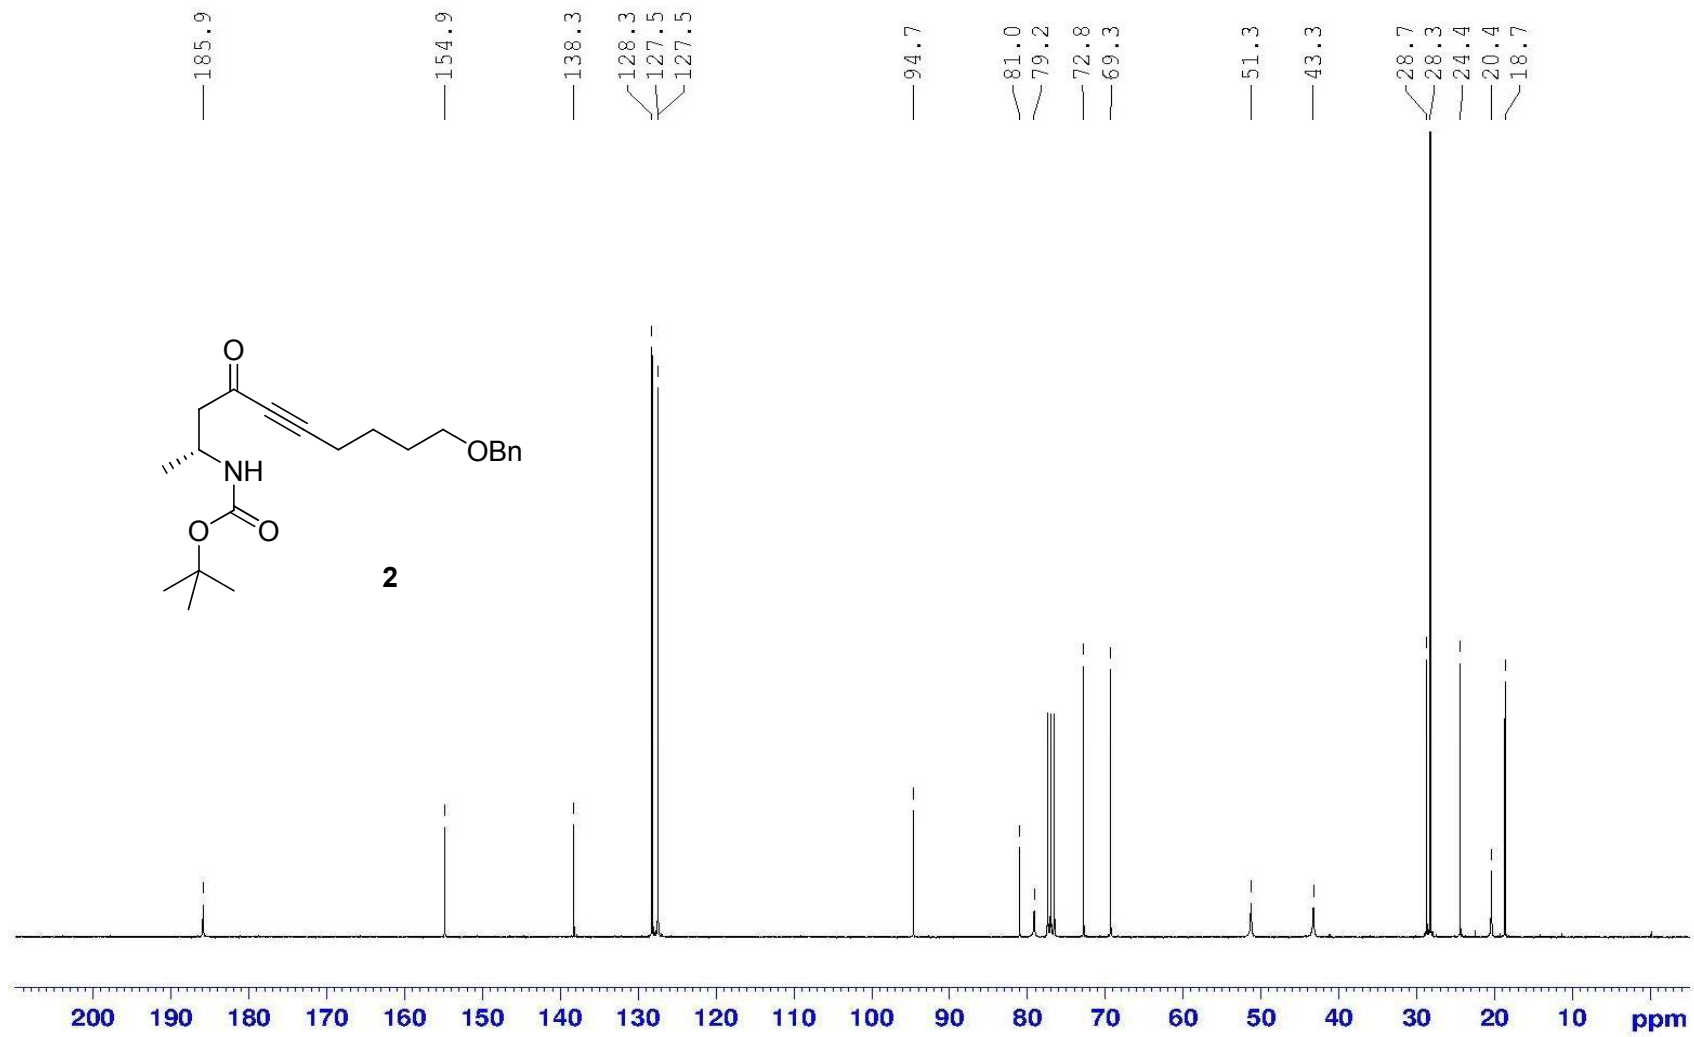

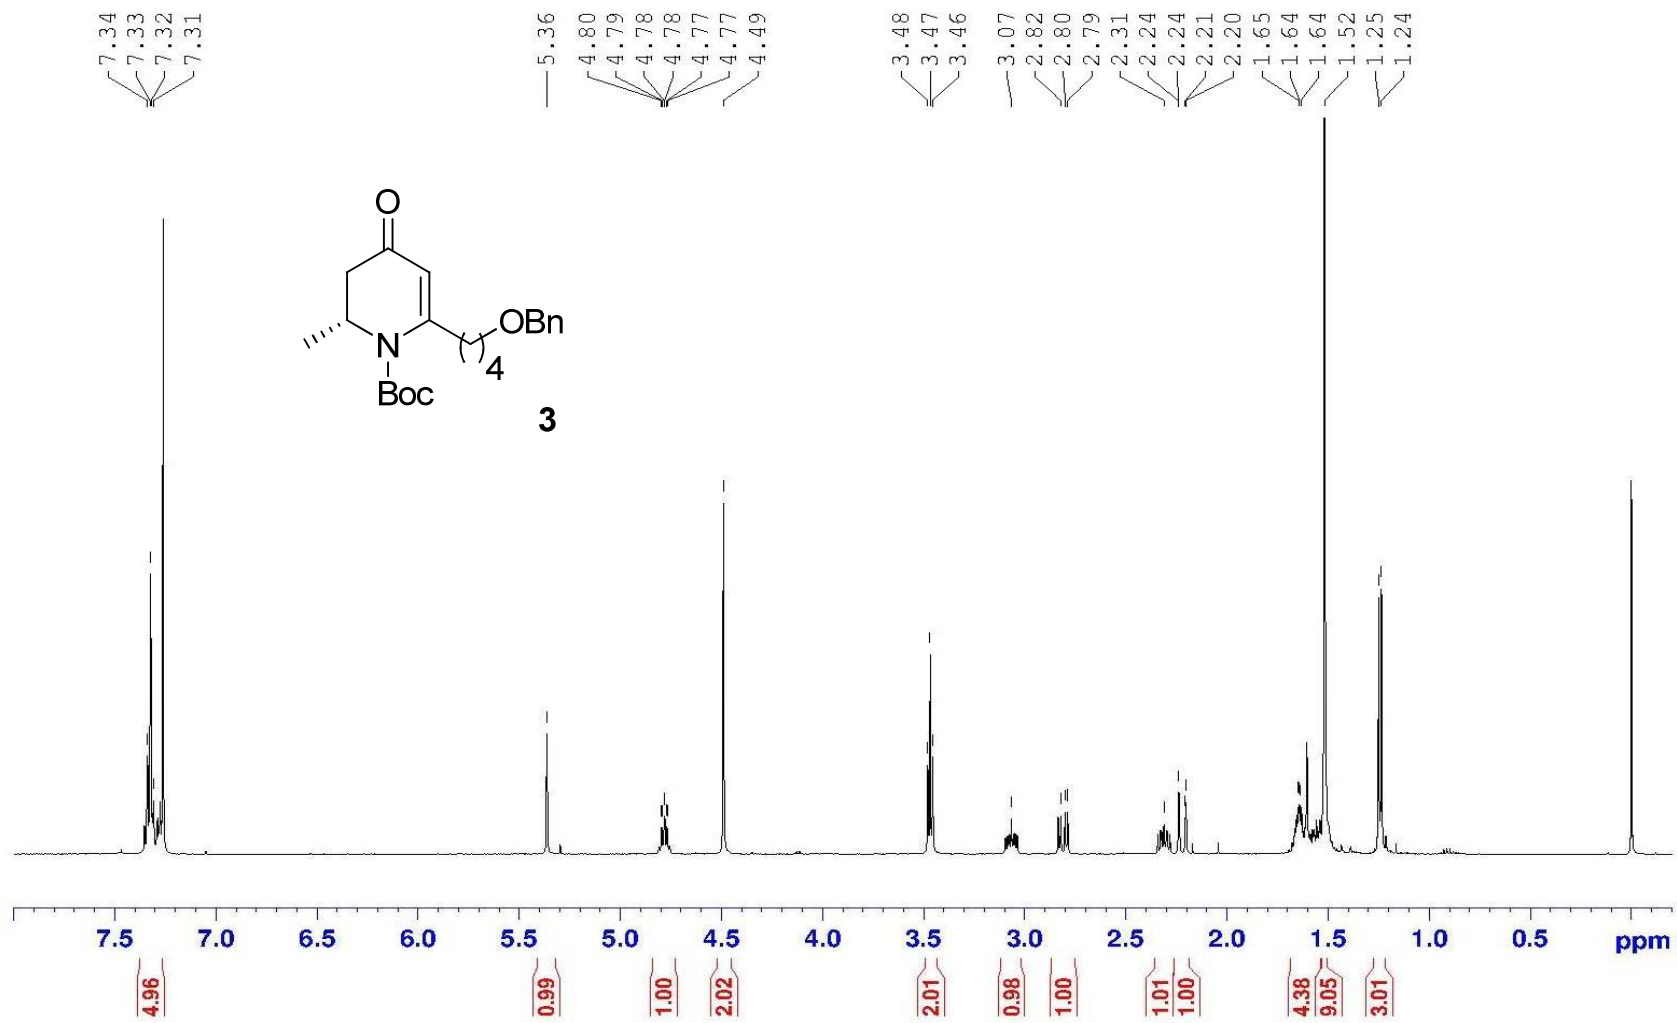

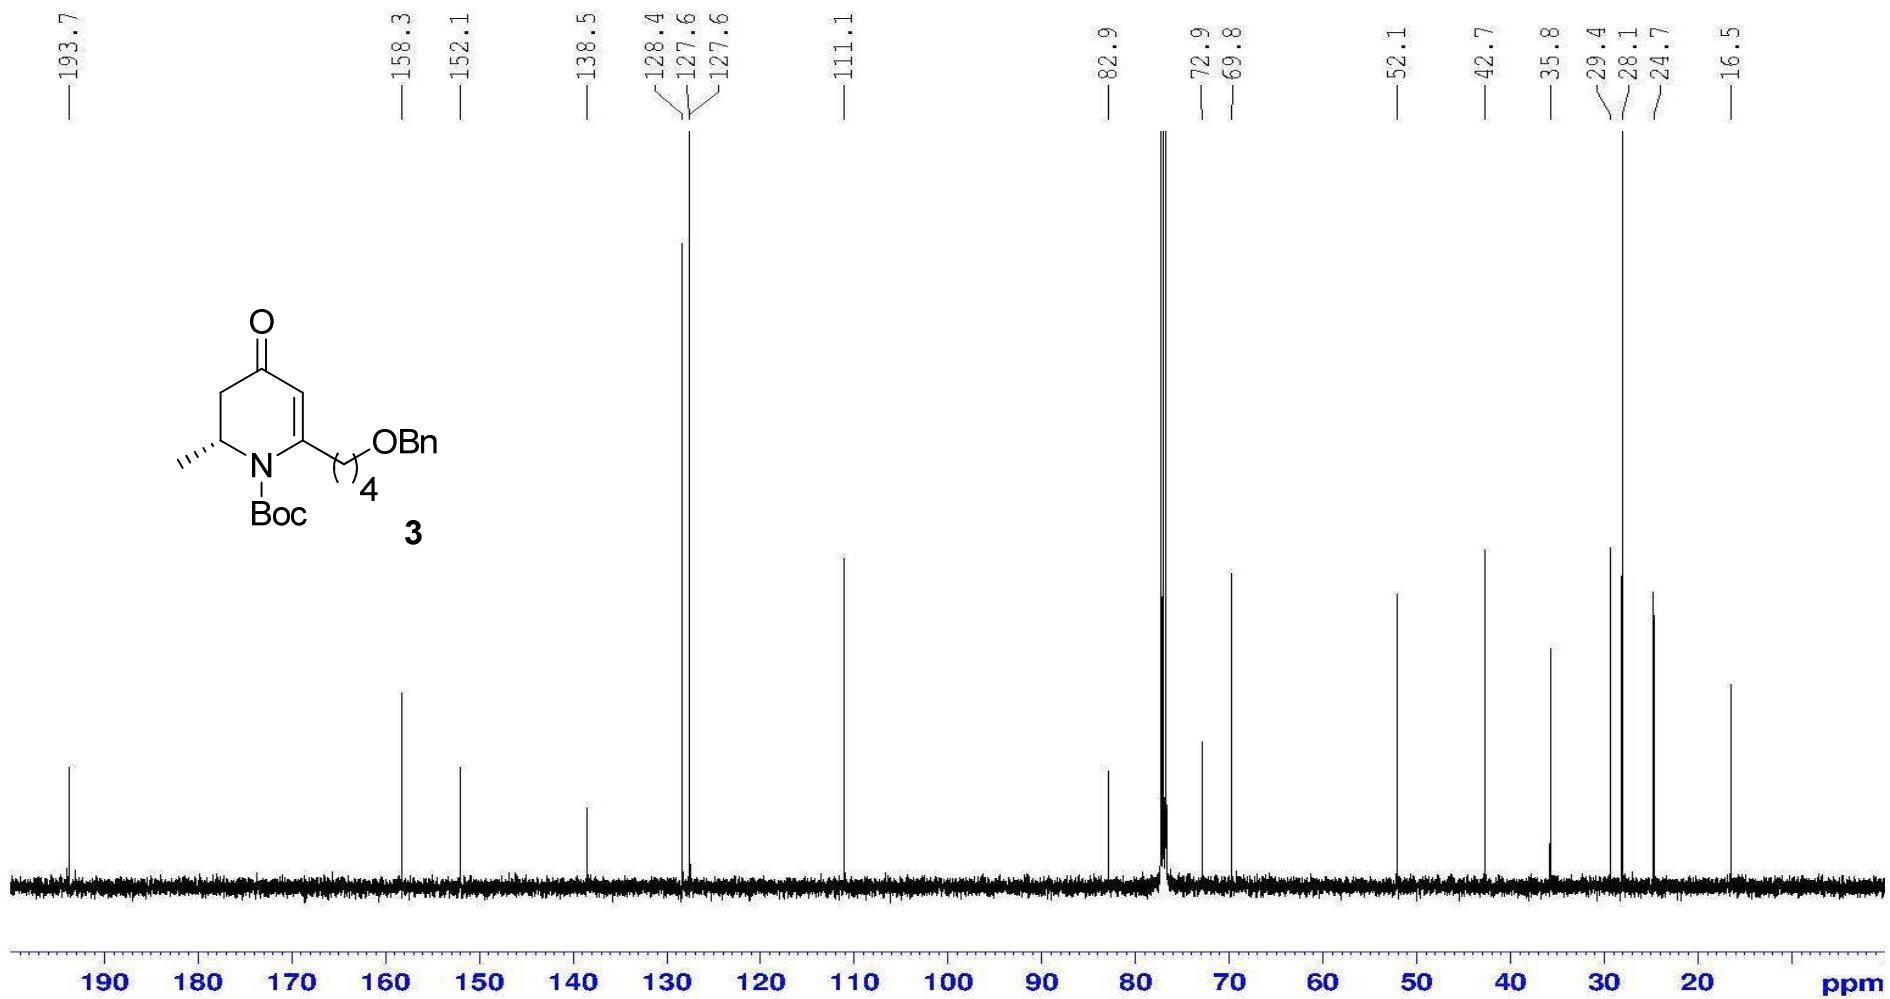

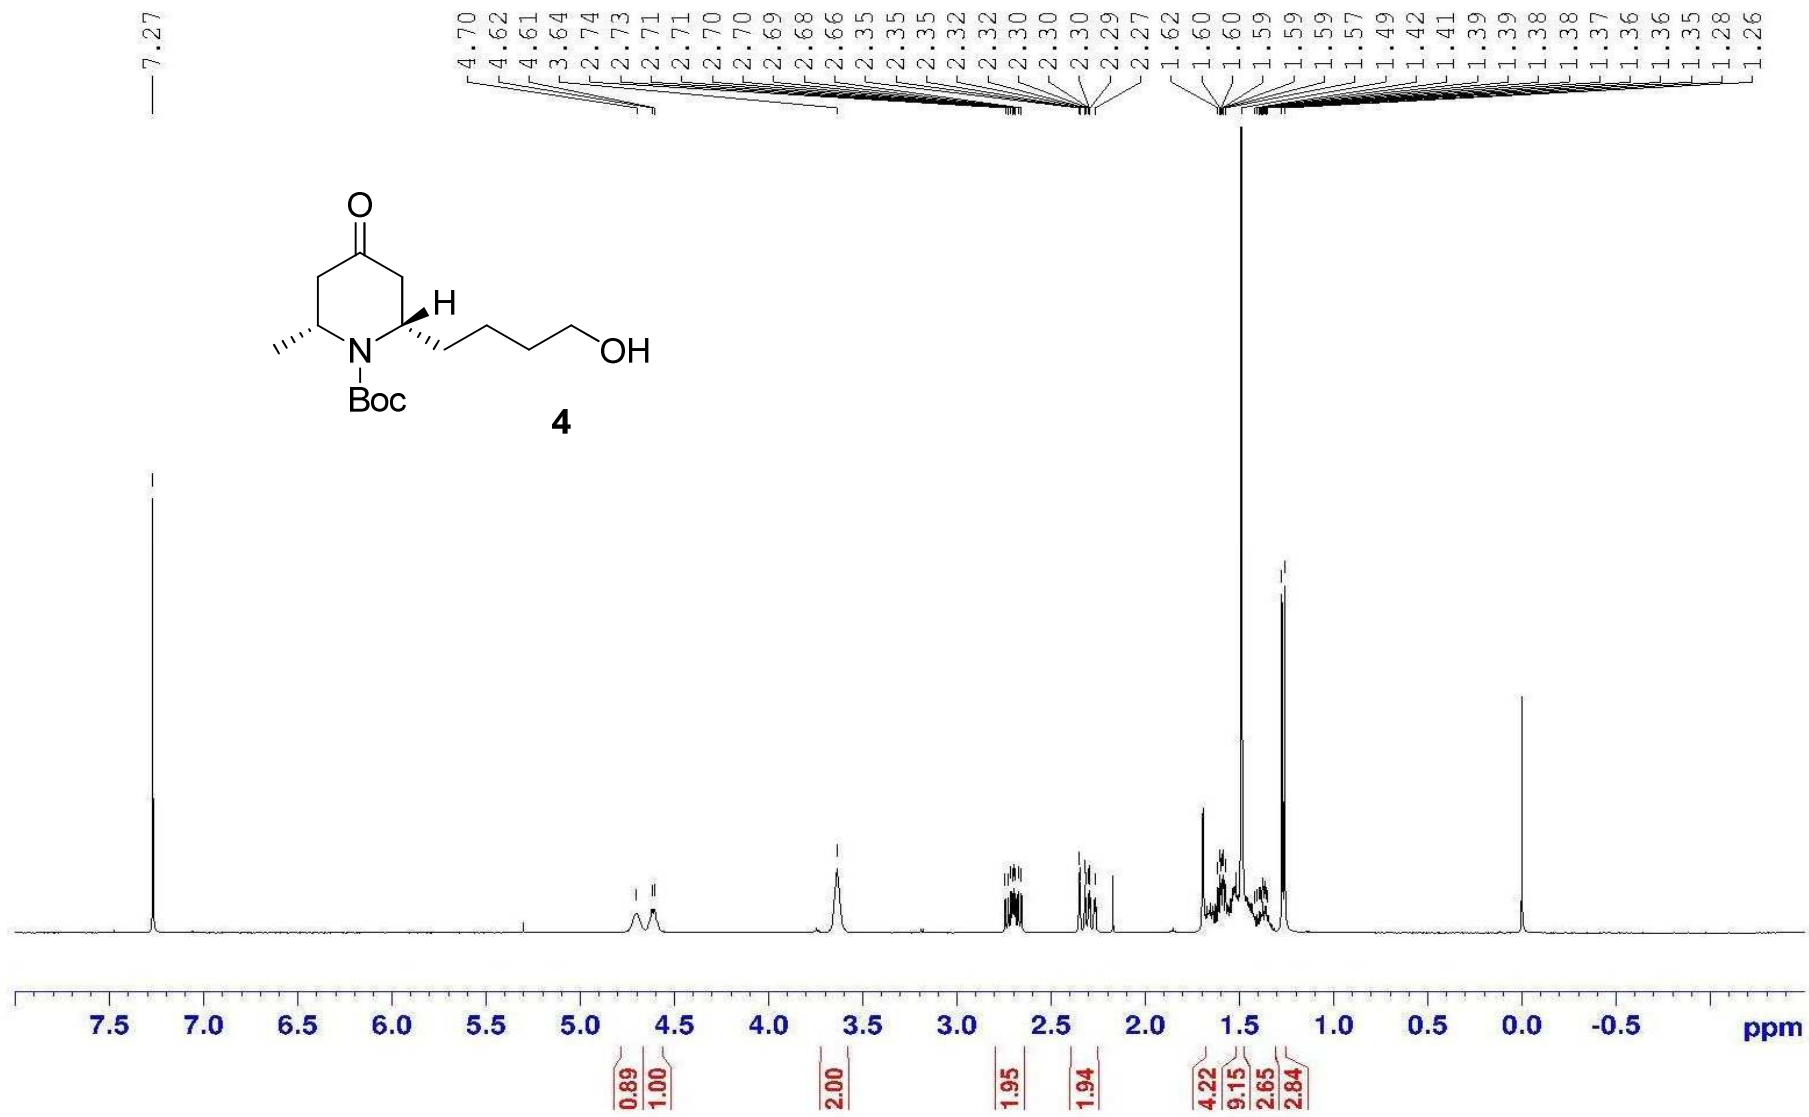

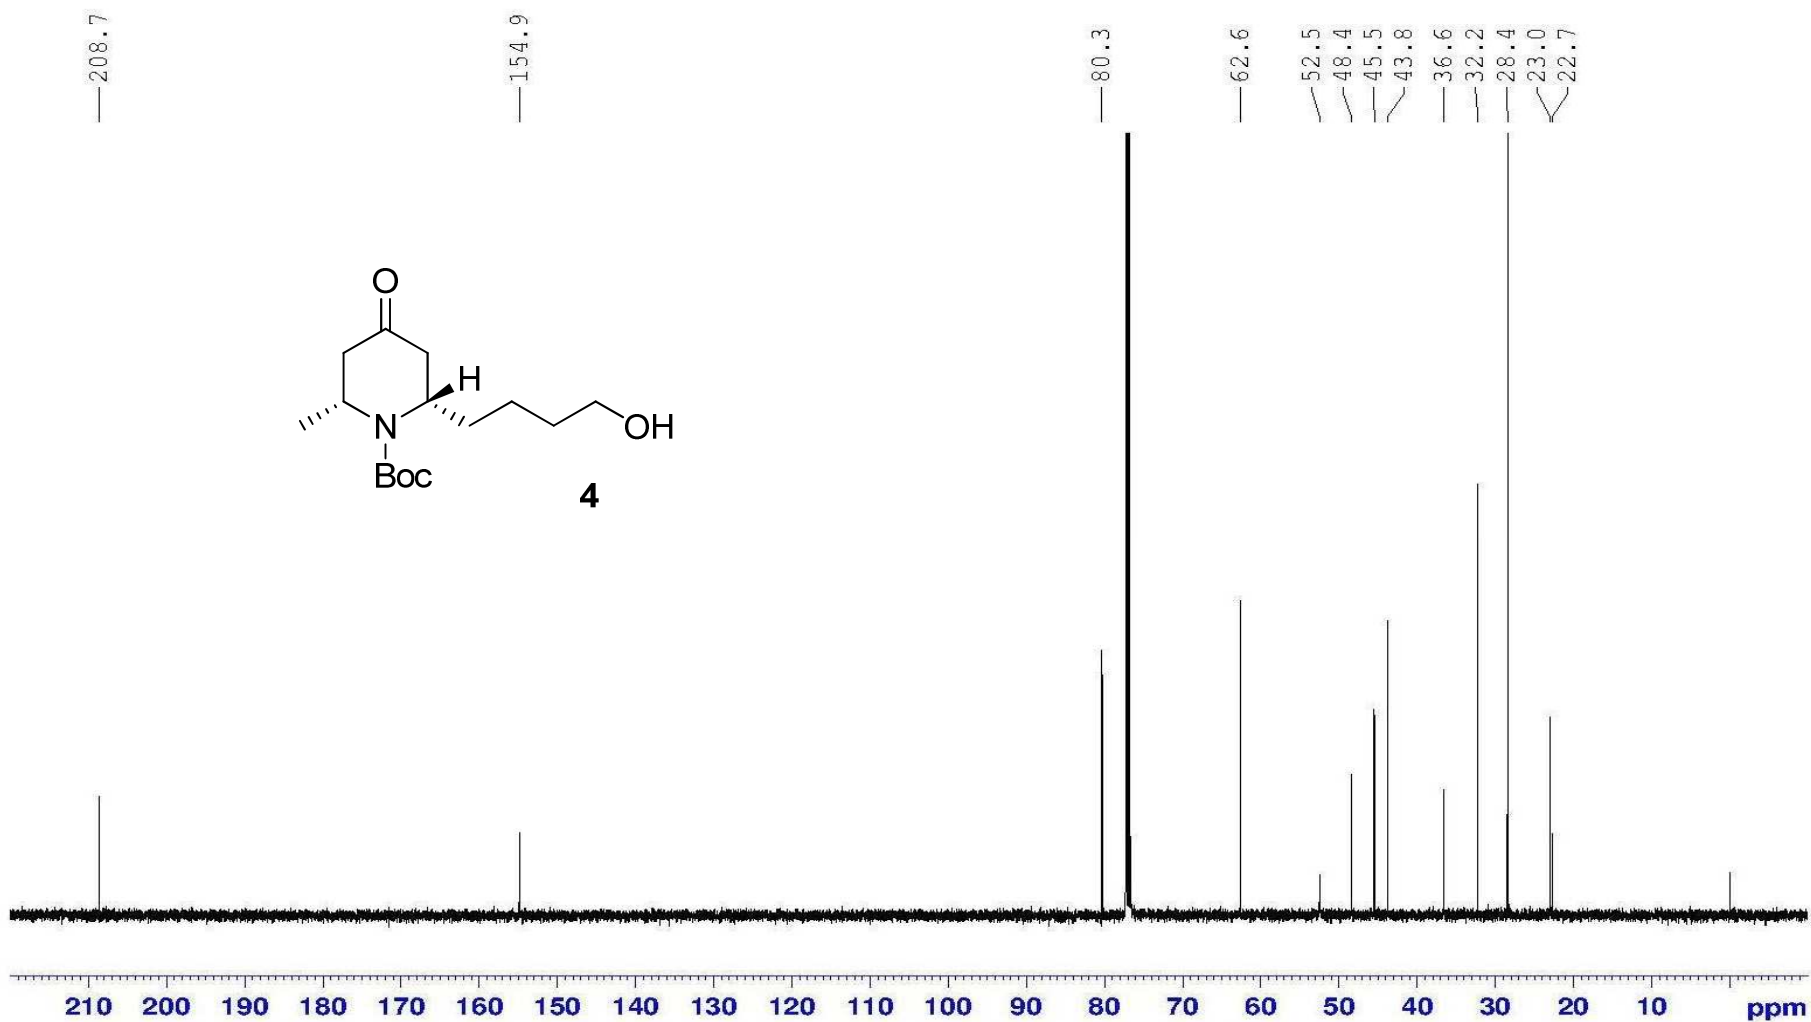

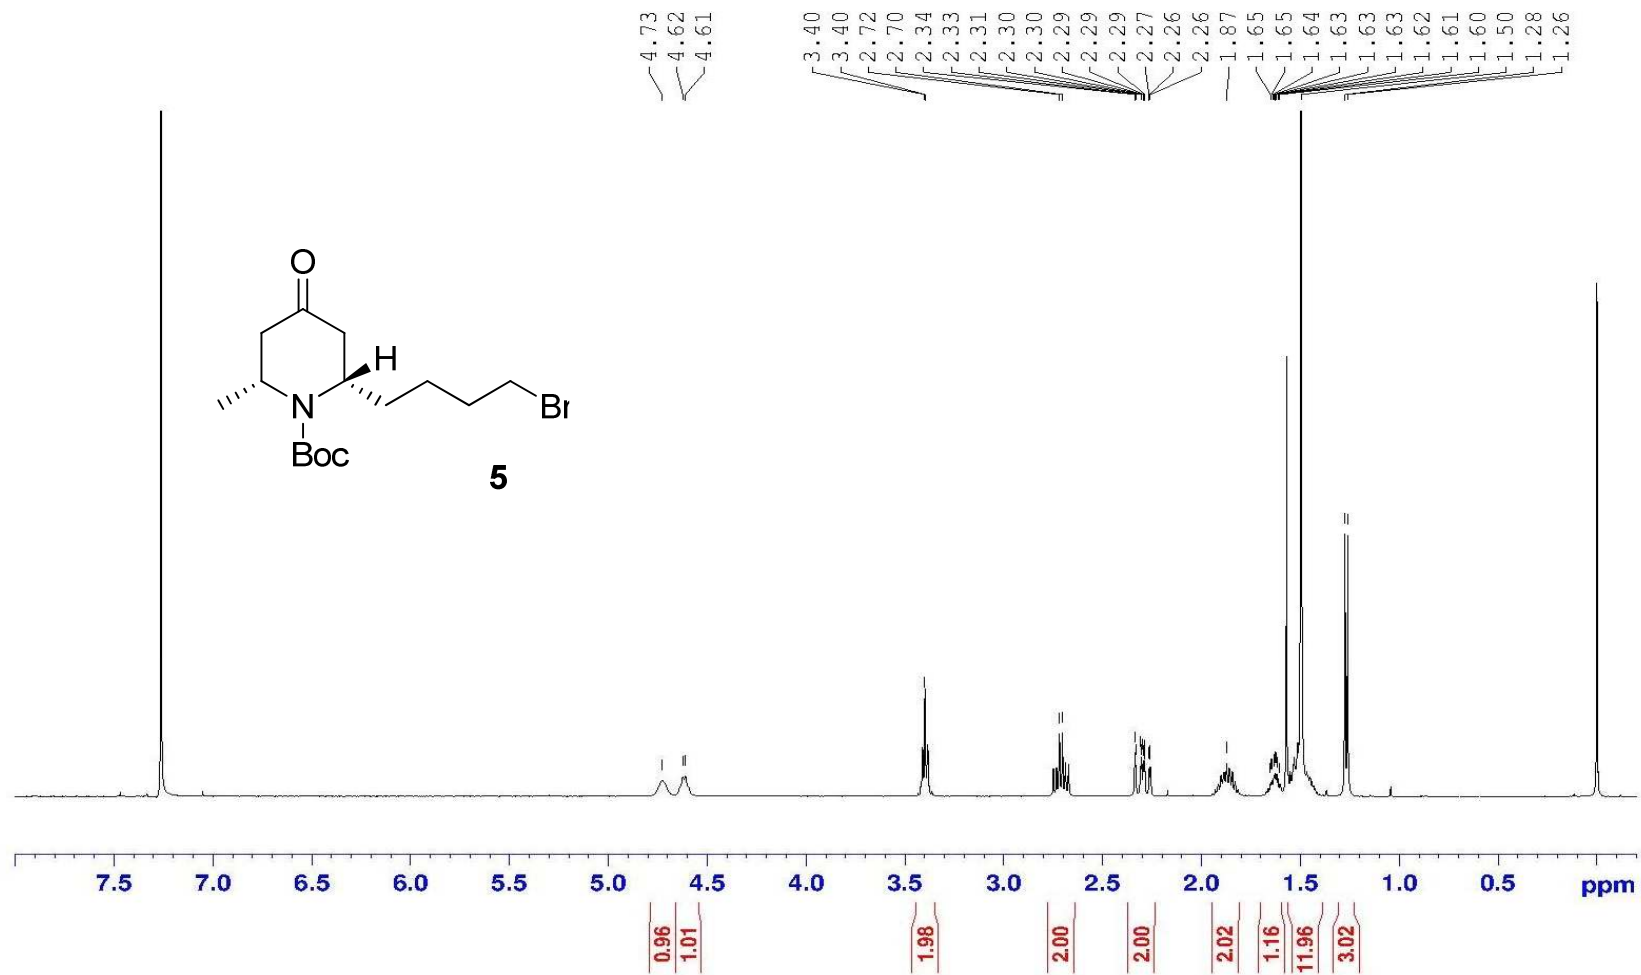



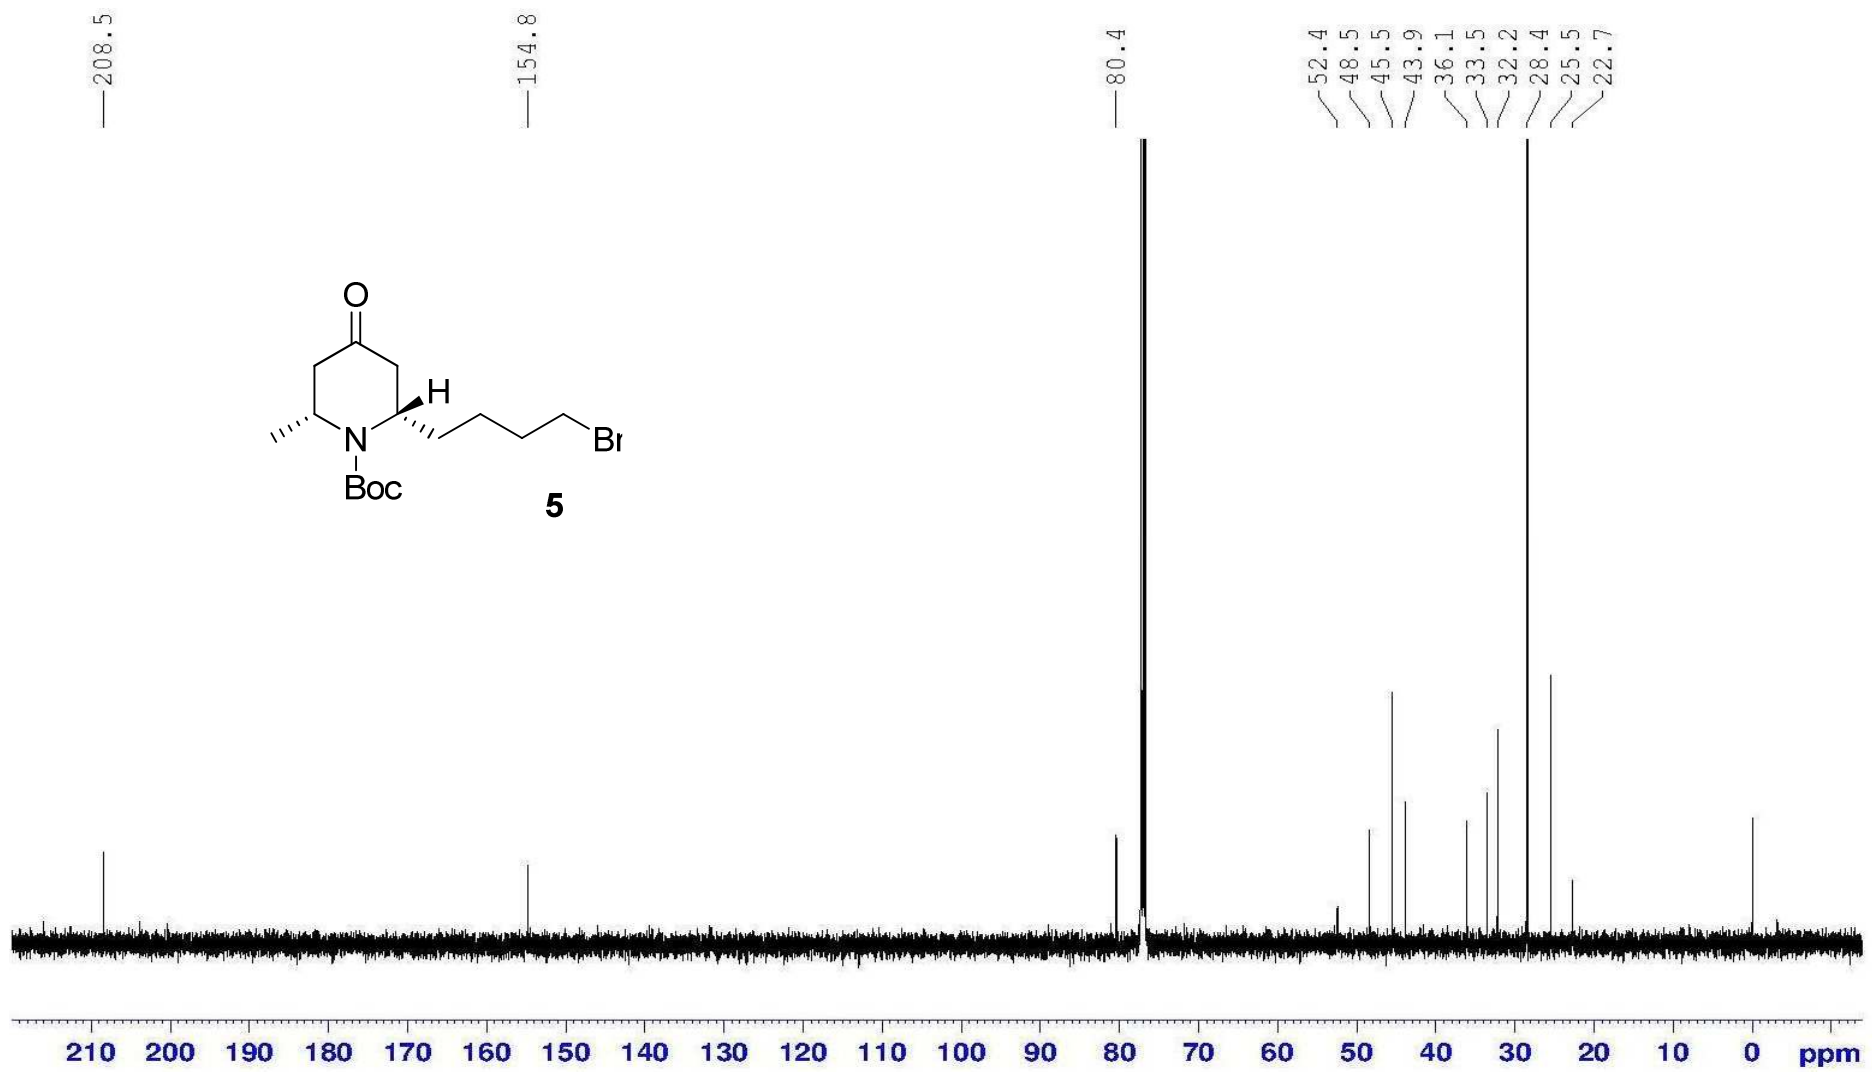

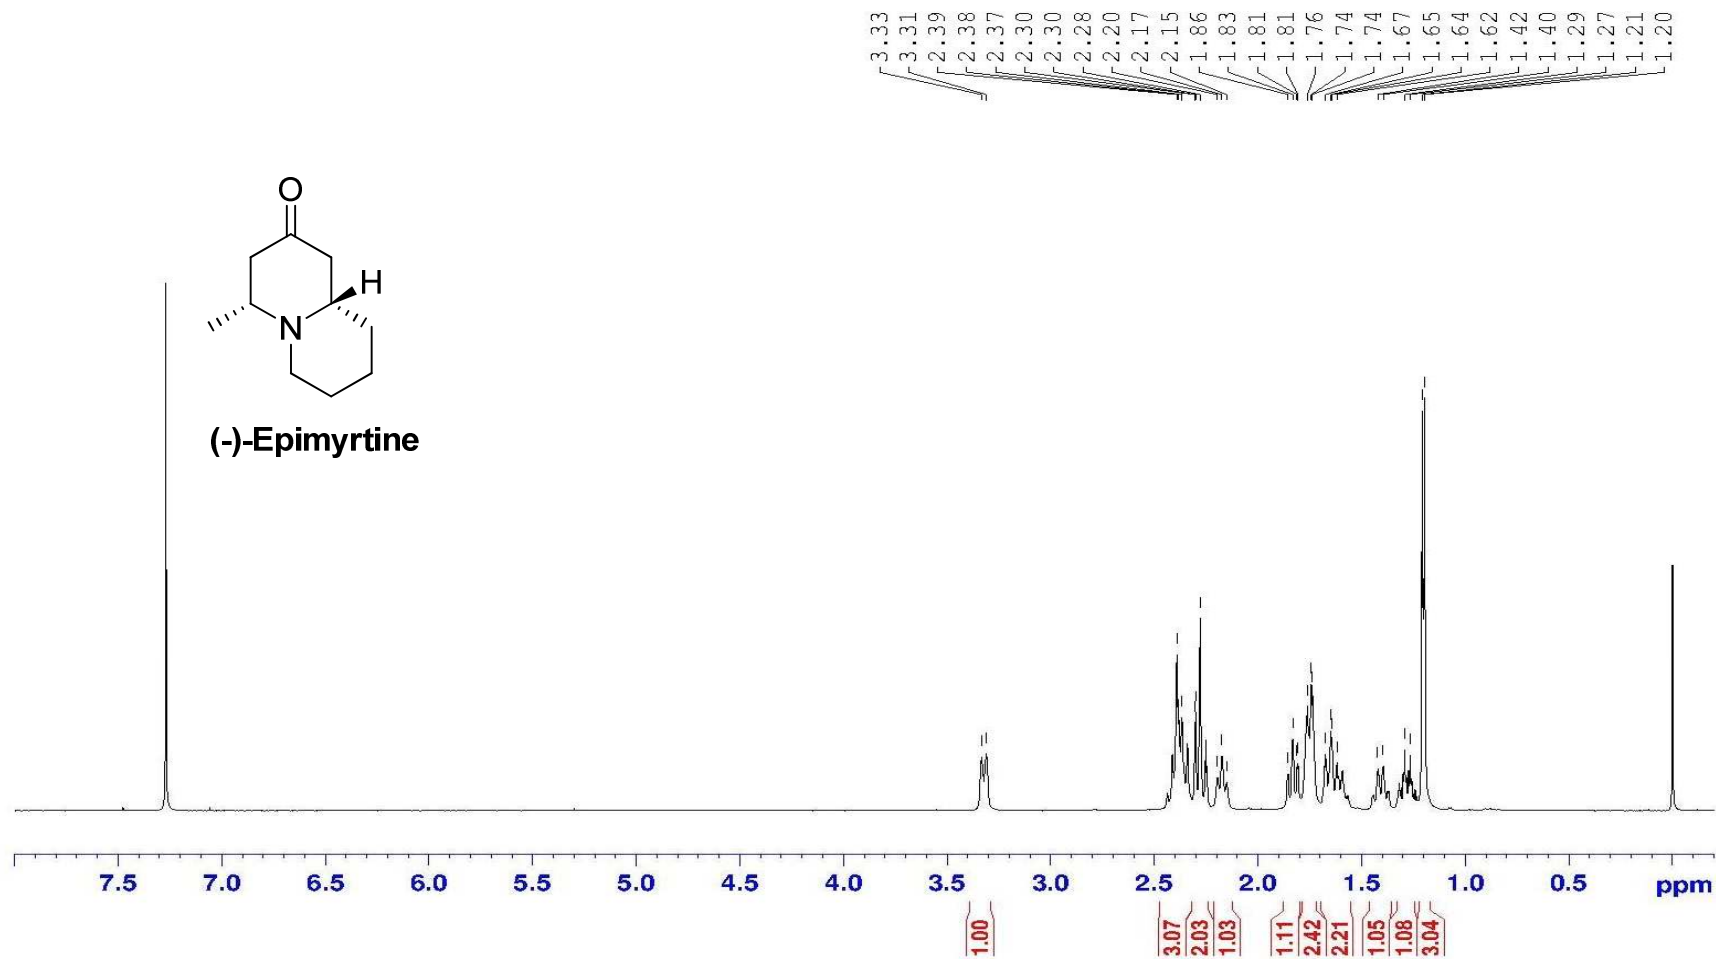

—208.4

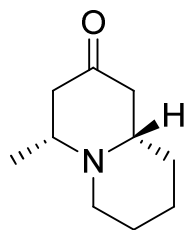

**(-)-Epimyrtine**

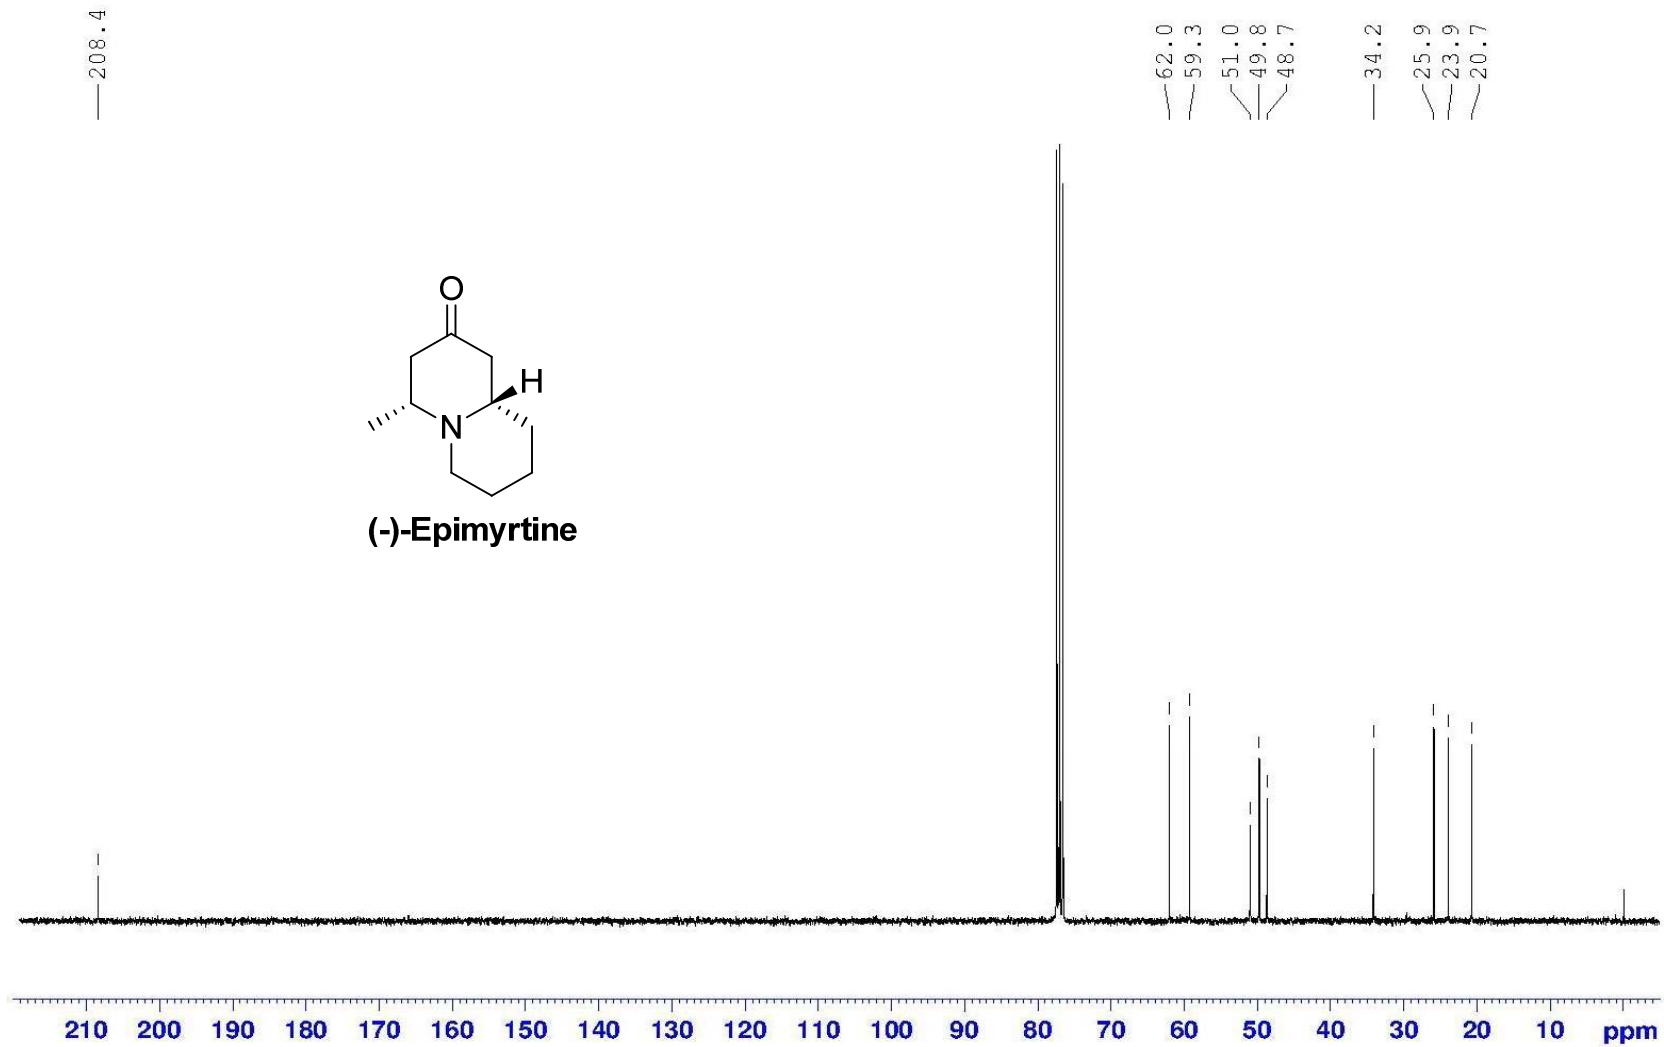

Supplement: Additional file 1 [file 1860-5397-9-242-S1.pdf]
